# Supplementary material for: Matrix solid-phase dispersion as a greener alternative to obtain bioactive extracts from Haematococcus pluvialis. Characterization by UHPLC-QToF
Source: Royal Society of Chemistry journal article supplement (doi:10.1039/d0ra04378h), 2020-01-01
Supplement: d0ra04378h1.pdf [file d0ra04378h1.pdf]

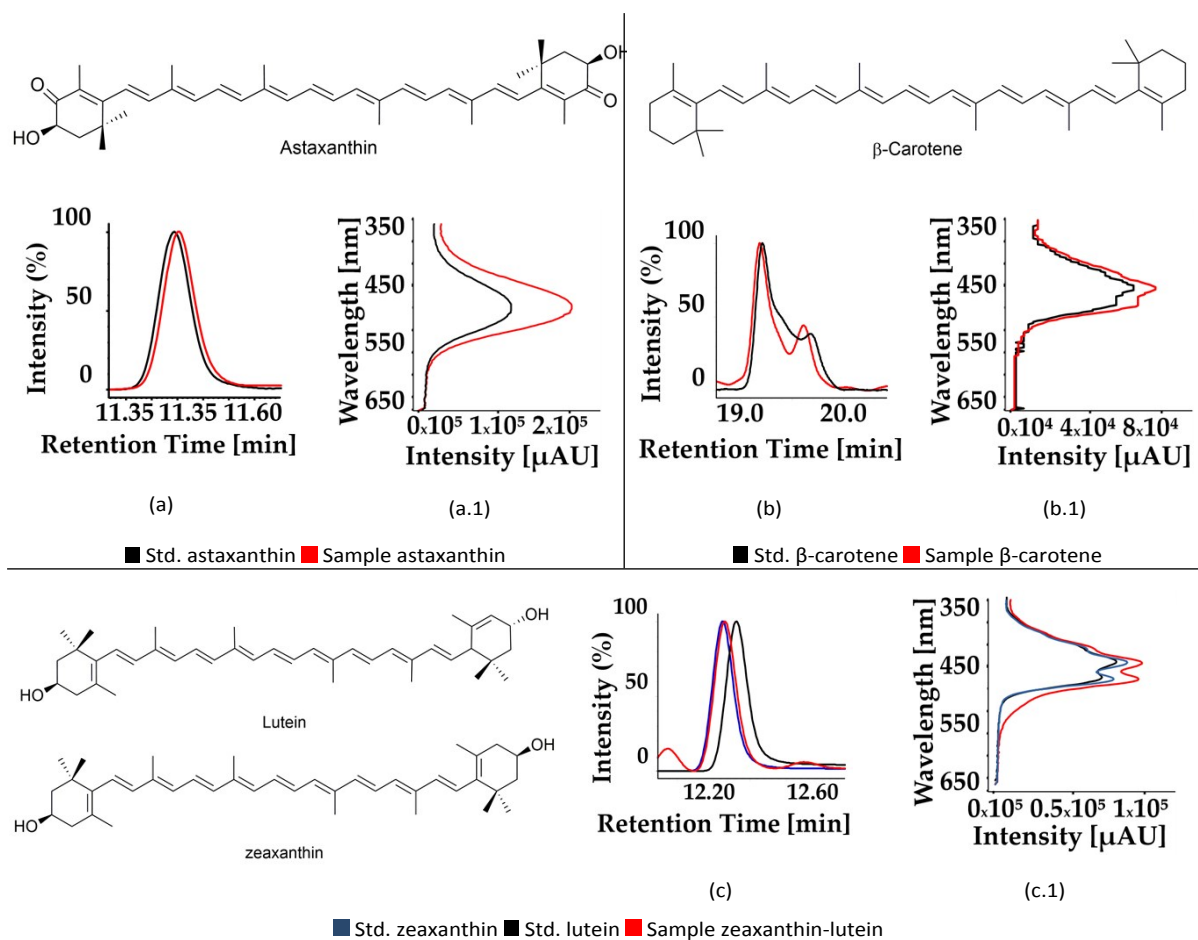

**Figure S1.** Overlay HPLC-DAD chromatograms of carotenoid standards and MSPD extracts in ethanol: (a) astaxanthin, (b) β-Carotene, (c) zeaxanthin-lutein; and their UV-Vis absorption spectra: (a.1) astaxanthin, (b.1) β-Carotene, (c.1) zeaxanthin-lutein

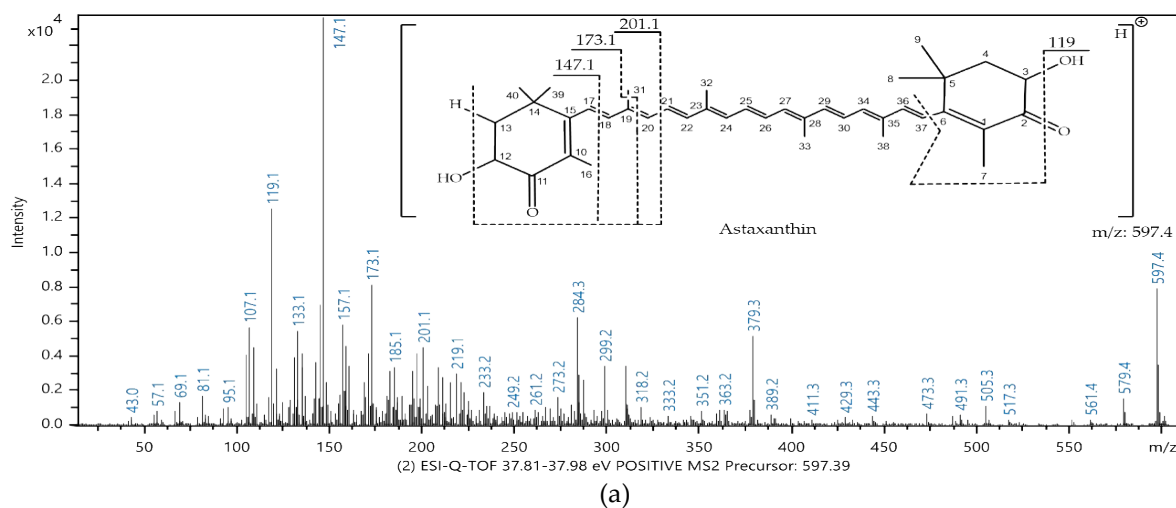

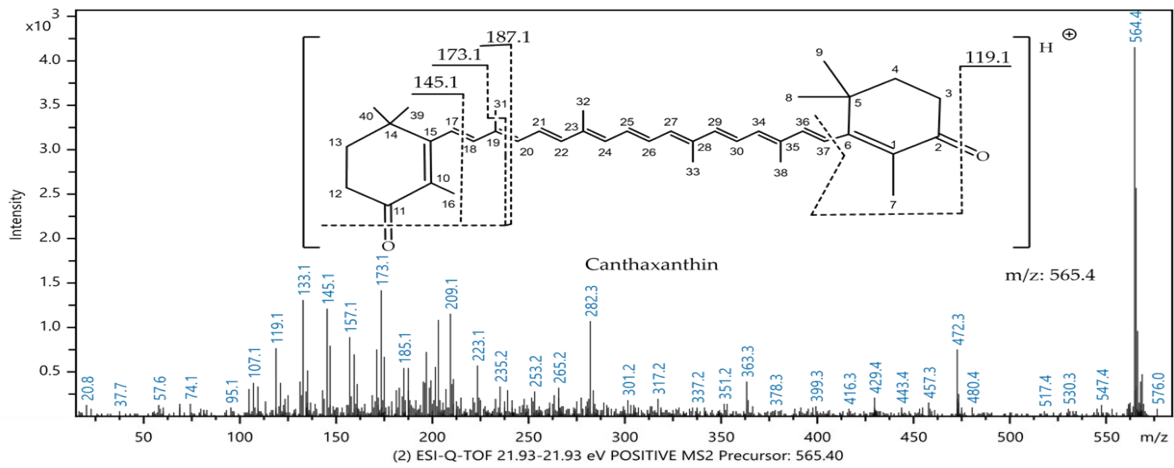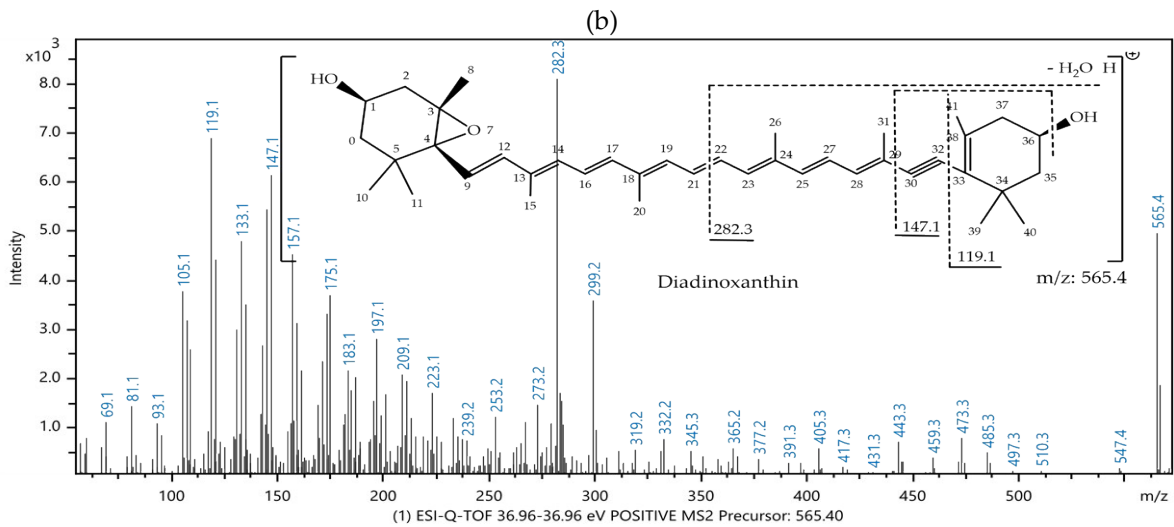

**Figure S2.** Mass spectrum obtained by UHPLC-QTOF of the carotenoid compounds present in the extract of *H. pluvialis* red. Astaxanthin (a). Canthaxanthin (b). Diadinoxanthin (c).

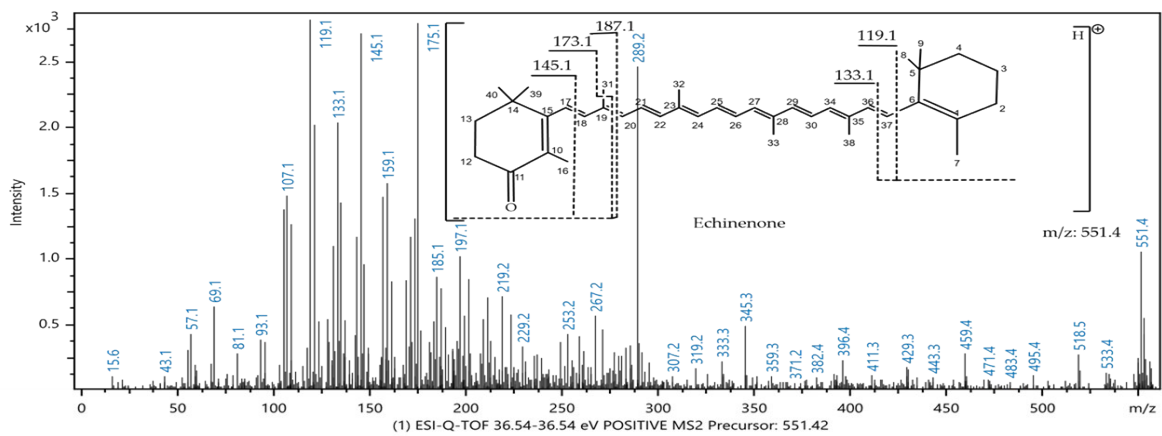

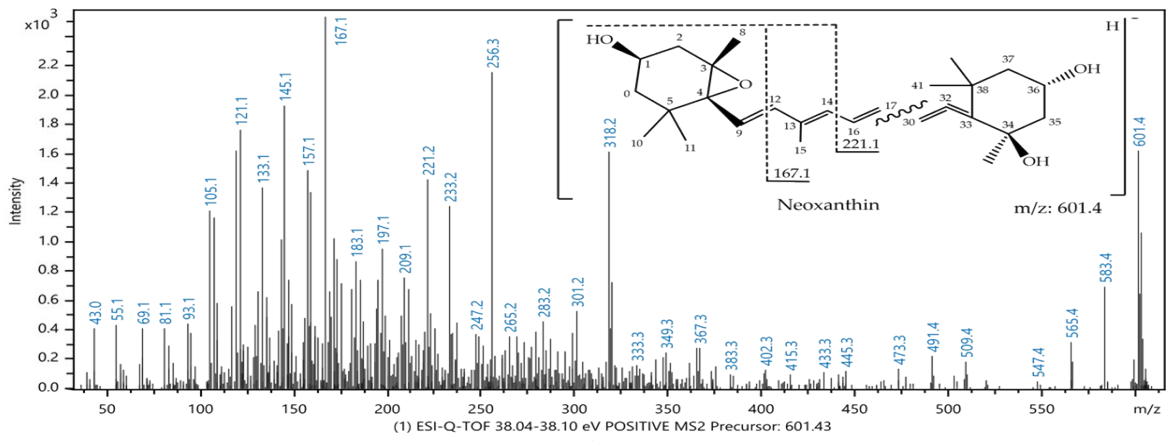

(b)

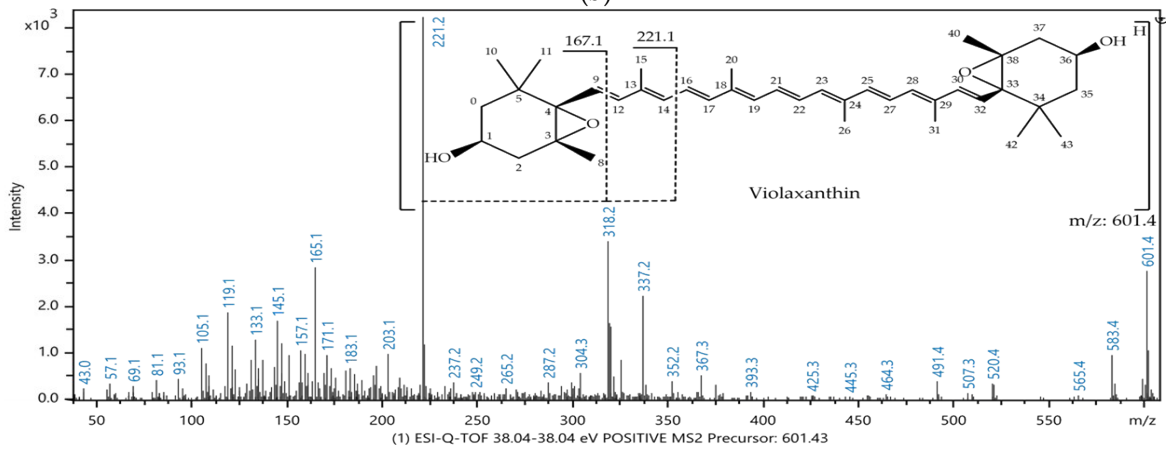

(c)

**Figure S3.** Mass spectrum obtained by UHPLC-QToF of the carotenoid compounds present in the extract of *H. pluvialis* red. Echinone (a). Neoxanthin (b). Violaxanthin (c)
